# Supplementary material for: The impact of high and low-intensity exercise in adolescents with movement impairment
Source: PubMed Central journal article supplement (PMC5919484; doi:10.1371/journal.pone.0195944), 2018-04-26
Supplement: pone.0195944.s001.pdf [file pone.0195944.s001.pdf]

Supplementary Table 1.

| ID         | Age | Height (cm) | Weight (kg) | BMI     | Tanner | Scal | BOT-2 | Shor | Standard S | %ile | Rankir |
|------------|-----|-------------|-------------|---------|--------|------|-------|------|------------|------|--------|
| P1         | 14  | 174.5       | 59.6        | 0.00196 | 5      | 55   | 34    | 6    |            |      |        |
| P2         | 14  | 169.6       | 47.8        | 0.00166 | 3      | 67   | 39    | 14   |            |      |        |
| P3         | 17  | 177         | 78.3        | 0.0025  | 5      | 65   | 37    | 10   |            |      |        |
| P4         | 13  | 164         | 54.6        | 0.00203 | 5      | 59   | 35    | 7    |            |      |        |
| P5         | 18  | 178.8       | 64.6        | 0.00202 | 5      | 70   | 40    | 16   |            |      |        |
| P6         | 11  | 145.8       | 47.1        | 0.00222 | 5      | 47   | 31    | 3    |            |      |        |
| P7         | 16  | 180         | 107.9       | 0.00333 | 5      | 57   | 34    | 6    |            |      |        |
| P8         | 15  | 172.8       | 87.9        | 0.00294 | 5      | 61   | 36    | 8    |            |      |        |
| P9         | 12  | 161.3       | 61.7        | 0.00237 | 4      | 60   | 37    | 10   |            |      |        |
| P10        | 12  | 168         | 64.5        | 0.00229 | 3      | 60   | 35    | 7    |            |      |        |
| P11        | 16  | 175         | 64          | 0.00209 | 5      | 66   | 38    | 12   |            |      |        |
| P12        | 16  | 175.5       | 57.3        | 0.00186 | 5      | 61   | 36    | 8    |            |      |        |
| P13        | 14  | 163.6       | 58.9        | 0.0022  | 4      | 68   | 38    | 12   |            |      |        |
| P14        | 16  | 176.6       | 61.8        | 0.00198 | 5      | 57   |       |      |            |      |        |
| P15        | 12  | 165.7       | 45.6        | 0.00166 | 3      | 62   | 38    | 12   |            |      |        |
| P16        | 16  | 173.4       | 59.5        | 0.00198 | 5      | 61   | 36    | 8    |            |      |        |
| P17        | 14  | 163         | 54.9        | 0.00207 | 5      | 69   | 39    | 14   |            |      |        |
| <b>NMI</b> |     |             |             |         |        |      |       |      |            |      |        |
| P18        | 17  | 176.3       | 62.6        | 0.00201 | 5      | 73   | 48    | 42   |            |      |        |
| P19        | 17  | 191.6       | 115.9       | 0.00316 | 5      | 65   | 43    | 10   |            |      |        |
| P20        | 14  | 183.8       | 79          | 0.00234 | 5      | 72   | 43    | 24   |            |      |        |
| P21        | 17  | 169.3       | 68.2        | 0.00238 | 5      | 77   | 47    | 41   |            |      |        |
| P22        | 17  | 181.1       | 61.4        | 0.00187 | 5      | 78   | 48    | 42   |            |      |        |
| P23        | 18  | 172.8       | 70          | 0.00234 | 5      | 73   | 42    | 21   |            |      |        |
| P24        | 18  | 192         | 81.4        | 0.00221 | 5      | 77   | 46    | 35   |            |      |        |
| P25        | 11  | 167         | 59.2        | 0.00212 | 2      | 65   | 41    | 18   |            |      |        |
| P26        | 13  | 179.5       | 66.5        | 0.00206 | 3      | 72   | 45    | 31   |            |      |        |
| P27        | 17  | 163.3       | 46.4        | 0.00174 | 5      | 79   | 51    | 54   |            |      |        |
| P28        | 13  | 174.6       | 60.4        | 0.00198 | 5      | 77   | 52    | 58   |            |      |        |
| P29        | 18  | 183.3       | 73.4        | 0.00218 | 5      | 76   | 45    | 31   |            |      |        |
| P30        | 16  | 169.7       | 55          | 0.00191 | 5      | 81   | 56    | 73   |            |      |        |
| P31        | 16  | 173.4       | 59.7        | 0.00199 | 5      | 80   | 53    | 62   |            |      |        |
| P32        | 12  | 165.5       | 45.4        | 0.00166 | 3      | 70   | 44    | 27   |            |      |        |
| P33        | 16  | 171.9       | 62          | 0.0021  | 5      | 70   | 41    | 18   |            |      |        |
| P34        | 17  | 173.1       | 70.2        | 0.00234 | 5      | 82   | 57    | 76   |            |      |        |
| P35        | 11  | 143         | 38.5        | 0.00188 | 3      |      |       |      |            |      |        |
| P36        | 14  | 183.2       | 84.7        | 0.00252 | 5      | 72   | 43    | 24   |            |      |        |
| P37        | 18  | 177.1       | 75.3        | 0.0024  | 5      |      |       |      |            |      |        |
| P38        | 17  | 172.4       | 59.6        | 0.00201 | 5      | 80   |       |      |            |      |        |

Supplementary Table 1.

| Descriptive | VO2 Max (l) | VO2 norma | VO2/Watt | VO2/HR  | HRmax | Wattmax | RER  | REROW |
|-------------|-------------|-----------|----------|---------|-------|---------|------|-------|
| MI          | 2.75468     | 46.2195   | 0.01059  | 0.01413 | 195   | 160     | 1.08 | 0.97  |
| MI          | 1.43757     | 30.0747   | 0.01027  | 0.00917 | 165   | 140     | 1.25 | 1.08  |
| MI          | 2.14114     | 27.3454   | 0.00824  | 0.01166 | 191   | 260     | 1.5  | 1.06  |
| MI          | 1.9231      | 35.2216   | 0.01344  | 0.01292 | 159   | 140     | 1.09 | 1.07  |
| MI          | 2.58356     | 39.9932   | 0.00994  | 0.01395 | 196   | 260     | 1.57 | 0.98  |
| MI          | 1.14209     | 24.2482   | 15.2279  | 8.58715 | 133   | 75      | 1.02 | 0.79  |
| MI          | 1.145       | 10.6117   | 0.01908  | 0.01205 |       | 60      | 1.02 | 1.03  |
| MI          | 2.5793      | 29.3436   | 0.01075  | 0.01336 | 193   | 240     | 1.31 | 0.84  |
| MI          | 1.56659     | 25.3904   | 0.01305  | 0.01059 | 148   | 120     | 1.04 | 0.98  |
| MI          | 1.554       | 24.093    | 0.00971  | 0.00863 | 180   | 160     | 1.44 | 1.13  |
| MI          | 1.8249      | 28.5141   | 0.01825  | 0.01508 | 121   | 100     | 1.04 | 1.35  |
| MI          | 2.13026     | 37.1773   | 0.01065  | 0.01076 | 198   | 200     | 1.38 | 0.94  |
| MI          | 1.425       | 24.129    | 0.01357  | 0.01056 | 135   |         |      |       |
| MI          | 2           | 39        | 0.01111  | 0.01093 | 183   | 105     | 1.12 | 1.03  |
| MI          | 2.23        | 48.032    | 0.01394  | 0.01155 | 193   | 180     | 1    | 0.81  |
| MI          | 2.107       | 35.4118   | 0.01505  | 0.01293 | 163   | 160     | 1.13 | 0.81  |
| MI          | 1.722       | 31.3661   | 0.01076  | 0.01019 | 169   | 140     | 1.24 | 0.95  |
|             |             |           |          |         |       |         |      |       |
| NMI         | 2.30788     | 36.8671   | 0.01648  | 0.01184 | 195   | 260     | 1.33 | 0.89  |
| NMI         | 2.66105     | 22.9599   | 0.01109  | 0.01565 | 170   | 240     | 1.25 | 0.98  |
| NMI         | 2.71673     | 34.3889   | 0.01235  | 0.01493 | 182   | 240     | 1.39 | 0.8   |
| NMI         | 2.8481      | 41.761    | 0.01187  | 0.01595 | 178   | 240     | 1.31 | 0.89  |
| NMI         | 2.71673     | 44.2464   | 0.01235  | 0.01493 | 187   | 240     | 1.4  | 0.8   |
| NMI         | 1.44375     | 20.625    | 0.01031  | 0.00825 | 188   | 160     | 1.41 | 0.94  |
| NMI         | 4.04691     | 49.7164   | 0.0119   | 0.02221 | 185   | 380     | 1.34 | 0.92  |
| NMI         | 1.74912     | 29.546    | 0.01094  | 0.01003 | 178   | 160     | 1.24 | 0.93  |
| NMI         | 3.1428      | 47.2602   | 0.01209  | 0.01599 | 197   |         |      |       |
| NMI         | 1.58446     | 34.1479   | 0.00903  | 0.00847 | 187   | 160     | 1.43 | 0.95  |
| NMI         | 2.48046     | 41.0671   | 0.00954  | 0.01326 | 186   | 260     | 1.48 | 1.02  |
| NMI         | 1.99325     | 27.156    | 0.01107  | 0.0127  | 157   | 180     | 1.4  | 1.01  |
| NMI         | 3.01879     | 54.8871   | 0.01372  | 0.01502 | 201   | 220     | 1.37 | 0.98  |
| NMI         | 3.02233     | 50.6253   | 0.01374  | 0.01504 | 220   | 220     | 1.37 | 0.98  |
| NMI         | 1.56659     | 25.3904   | 13.0549  | 10.5851 | 148   | 200     | 1.28 | 0.98  |
| NMI         | 1.65044     | 26.6201   | 0.01179  | 0.01022 | 162   | 140     | 1.34 | 1.01  |
| NMI         | 3.56705     | 50.8126   | 0.01274  | 0.02015 | 177   | 280     | 1.41 | 1.01  |
| NMI         | 0.769       | 19.974    | 12.8167  | 5.16107 | 149   |         | 1.09 | 0.93  |
| NMI         | 2.069       | 24.4274   | 0.01293  | 0.01182 | 175   | 160     | 1.22 | 1.09  |
| NMI         | 2.518       | 33.4396   | 0.01399  | 0.01455 | 173   | 180     | 1.25 | 1.11  |
| NMI         | 2.374       | 39.8322   | 0.01187  | 0.01326 | 179   | 200     | 1.4  | 0.88  |

Supplementary Table 1.

| RER20W | RPE1min-L Breathing | Overall | RPE2min | B | O | RPE3min | B  |
|--------|---------------------|---------|---------|---|---|---------|----|
| 0.8    |                     |         |         |   |   |         |    |
| 1.05   | 2                   |         |         | 3 |   |         | 4  |
| 1      | 1                   | 1       | 1       | 2 | 2 | 2       | 2  |
| 0.92   | 1                   | 1       | 1       | 3 | 4 | 5       | 5  |
| 0.95   | 1                   | 1       | 1       | 1 | 1 | 1       | 1  |
| 0.78   | 1                   | 1       | 1       | 1 | 3 | 1       | 3  |
| 1.17   | 2                   | 4       | 4       | 6 | 8 | 7       | 10 |
| 1.03   | 1                   | 2       | 1       | 1 | 2 | 2       | 1  |
| 0.88   | 1                   | 2       | 3       | 3 | 4 | 4       | 4  |
| 1.19   | 1                   | 1       | 1       | 2 | 3 | 2       | 2  |
| 1.26   | 1                   | 2       | 1       | 3 | 5 | 2       | 5  |
| 0.98   | 1                   | 1       | 1       | 1 | 1 | 1       | 1  |
|        | 1                   | 1       | 1       | 1 | 1 | 1       | 2  |
| 1.04   | 1                   | 1       | 1       | 1 | 1 | 1       | 1  |
| 0.86   | 1                   | 1       | 1       | 1 | 1 | 1       | 1  |
| 0.79   | 2                   | 2       | 2       | 4 | 3 | 3       | 5  |
| 0.92   | 1                   | 1       | 1       | 1 | 1 | 1       | 1  |
| 0.82   | 1                   |         |         | 1 |   |         | 2  |
| 0.94   | 1                   |         |         | 1 |   |         | 1  |
| 0.79   | 1                   |         |         | 1 |   |         | 1  |
| 0.81   | 2                   | 1       | 1       | 2 | 1 | 1       | 4  |
| 0.78   | 1                   | 1       | 1       | 2 | 2 | 2       | 2  |
| 0.9    | 1                   | 1       | 1       | 1 | 1 | 1       | 1  |
| 0.96   | 1                   | 1       | 1       | 1 | 1 | 1       | 1  |
| 0.91   | 1                   | 2       | 2       | 3 | 3 | 3       | 3  |
|        | 1                   | 1       | 1       | 1 | 1 | 1       | 1  |
| 0.97   | 1                   | 1       | 1       | 1 | 1 | 1       | 2  |
| 1      | 1                   | 1       | 1       | 1 | 1 | 1       | 1  |
| 0.98   | 1                   | 1       | 1       | 2 | 2 | 2       | 3  |
| 0.96   | 1                   | 1       | 1       | 1 | 1 | 2       | 1  |
| 0.96   | 1                   | 1       | 1       | 1 | 1 | 1       | 1  |
| 0.91   | 1                   | 1       | 1       | 1 | 1 | 1       | 1  |
| 1.03   | 1                   | 1       | 1       | 1 | 2 | 1       | 2  |
| 1.03   | 1                   | 1       | 1       | 2 | 2 | 2       | 2  |
| 0.9    | 1                   | 1       | 1       | 6 | 4 | 5       | 7  |
| 1.03   | 1                   | 2       | 3       | 1 | 2 | 3       | 4  |
| 1.01   | 1                   | 1       | 1       | 1 | 1 | 1       | 2  |
| 0.95   | 2                   | 1       | 2       | 2 | 1 | 2       | 2  |

Supplementary Table 1.

| O  | RPE4min | B | O | RPE5min | B | O  | RPE6min | B   |
|----|---------|---|---|---------|---|----|---------|-----|
|    |         | 5 |   |         | 6 |    |         | 7   |
| 2  | 3       |   | 3 | 3       | 4 | 4  | 4       | 5   |
| 5  | 5       |   | 7 | 6       | 7 | 8  | 7       | 7   |
| 1  | 1       |   | 2 | 2       | 1 | 2  | 2       | 2   |
| 3  | 6       |   | 6 | 6       | 9 | 10 | 10      |     |
| 10 | 10      |   | 6 | 7       | 8 | 4  | 5       |     |
| 2  | 2       |   | 3 | 3       | 3 | 3  | 3       | 3   |
| 4  | 5       |   | 5 | 5       | 6 | 7  | 7       | 7   |
| 2  | 3       |   | 3 | 3       | 4 | 3  | 4       | 5   |
| 4  | 6       |   | 6 | 5       | 7 | 8  | 6       | 7   |
| 1  | 1       |   | 1 | 1       | 1 | 2  | 1       | 1   |
| 2  | 2       |   | 3 | 3       | 4 | 4  | 3       | 6   |
| 1  | 1       |   | 1 | 1       | 1 | 1  | 1       | 1   |
| 1  | 1       |   | 1 | 1       | 6 | 1  | 1       | 7   |
| 4  | 8       |   | 6 | 6       | 8 | 6  | 6       | 9   |
| 1  | 2       |   | 2 | 2       | 2 | 2  | 2       | 3   |
|    |         | 2 |   |         | 3 |    |         | 3   |
|    |         | 1 |   |         | 1 |    |         | 1   |
|    |         | 1 |   |         | 2 |    |         | 2.5 |
| 3  | 5       |   | 6 | 6       | 6 | 5  | 4       | 7   |
| 2  | 2       |   | 2 | 2       | 3 | 3  | 3       | 4   |
| 1  | 2       |   | 1 | 2       | 3 | 3  | 3       | 5   |
| 1  | 1       |   | 1 | 1       | 1 | 1  | 1       | 1   |
| 4  | 5       |   | 4 | 4       | 5 | 5  | 5       | 5   |
| 1  | 1       |   | 1 | 1       | 1 | 1  | 1       | 3   |
| 2  | 2       |   | 2 | 2       | 2 | 2  | 2       | 3   |
| 1  | 1       |   | 1 | 1       | 1 | 1  | 1       | 2   |
| 2  | 3       |   | 2 | 3       | 4 | 3  | 3       | 5   |
| 1  | 1       |   | 1 | 1       | 1 | 1  | 1       | 2   |
| 1  | 2       |   | 2 | 2       | 2 | 3  | 3       | 3   |
| 1  | 1       |   | 1 | 1       | 2 | 2  | 2       | 2   |
| 2  | 2       |   | 1 | 2       | 3 | 2  | 3       | 6   |
| 2  | 2       |   | 2 | 2       | 3 | 3  | 3       | 3   |
| 6  | 8       |   | 8 | 8       | 9 | 10 | 10      | 10  |
| 6  | 7       |   | 8 | 10      | 7 | 8  | 9       | 5   |
| 1  | 2       |   | 1 | 1       | 2 | 2  | 1       | 3   |
| 2  | 2       |   | 1 | 2       | 2 | 2  | 2       | 3   |

Supplementary Table 1.

| O | RPE7min | B | O  | RPE8min | B  | O  | RPE9min | B  |
|---|---------|---|----|---------|----|----|---------|----|
|   |         | 8 |    |         | 9  |    |         |    |
| 5 | 6       |   | 5  | 6       | 6  | 5  | 6       | 7  |
| 9 | 9       |   | 10 | 9       | 1  | 10 | 9       | 10 |
| 2 | 2       |   | 3  | 3       | 3  | 3  | 3       | 4  |
|   |         |   |    |         |    |    |         |    |
| 3 | 4       |   | 5  | 4       | 5  | 5  | 5       | 7  |
| 8 | 7       |   | 7  | 8       |    |    |         |    |
| 4 | 6       |   | 4  | 5       | 6  | 5  | 6       | 8  |
| 7 | 8       |   | 8  | 8       | 7  | 7  | 7       | 6  |
| 1 | 1       |   | 2  | 1       | 2  | 2  | 1       | 2  |
| 6 | 7       |   | 8  | 8       | 10 | 10 | 10      |    |
| 1 | 1       |   | 1  | 1       | 1  | 1  | 1       | 1  |
| 1 | 8       |   | 5  | 2       | 9  | 6  | 3       | 10 |
| 6 | 9       |   | 6  | 6       | 10 | 7  | 6       |    |
| 3 | 7       |   | 5  | 6       | 7  | 5  | 6       | 9  |
|   |         |   |    |         |    |    |         |    |
|   | 4       |   |    |         | 5  |    |         | 6  |
|   | 2       |   |    |         | 2  |    |         | 3  |
|   | 3       |   |    |         | 4  |    |         | 5  |
| 4 | 3       |   | 5  | 4       | 7  | 6  | 5       | 7  |
| 4 | 5       |   | 5  | 5       | 5  | 5  | 5       | 6  |
| 5 | 8       |   | 8  | 8       | 9  | 8  | 9       |    |
| 2 | 1       |   | 2  | 2       | 2  | 2  | 2       | 3  |
| 5 | 7       |   | 6  | 7       | 8  | 9  | 9       | 5  |
| 1 | 4       |   | 1  | 2       | 4  | 2  | 3       | 4  |
| 3 | 4       |   | 4  | 4       | 6  | 6  | 6       | 8  |
| 2 | 2       |   | 2  | 2       | 2  | 2  | 2       | 3  |
| 4 | 6       |   | 4  | 5       | 7  | 5  | 6       | 8  |
| 2 | 2       |   | 2  | 2       | 3  | 3  | 3       | 4  |
| 3 | 4       |   | 4  | 4       | 5  | 5  | 5       | 6  |
| 2 | 3       |   | 3  | 3       | 3  | 4  | 4       | 5  |
| 6 | 9       |   | 6  | 8       | 10 | 7  | 10      |    |
| 3 | 4       |   | 4  | 4       | 4  | 4  | 4       | 5  |
| 9 | 10      |   | 7  | 8       |    |    |         |    |
| 4 | 4       |   | 9  | 6       | 3  | 5  | 2       | 4  |
| 2 | 5       |   | 3  | 3       | 7  | 4  | 3       | 7  |
| 3 | 3       |   | 2  | 3       | 4  | 3  | 4       | 5  |

Supplementary Table 1.

| O  | RPE10min B | O | RPE11min B | O   | RPE12min B |   |     |    |
|----|------------|---|------------|-----|------------|---|-----|----|
| 7  | 8          | 7 | 8          | 8   | 7          | 8 | 9   | 8  |
| 10 |            |   |            |     |            |   |     |    |
| 4  | 5          | 4 | 5          | 5   | 4          | 5 | 6   | 5  |
| 7  | 7          | 8 | 7          | 9   | 9          | 9 | 9   | 9  |
| 8  |            |   |            |     |            |   |     |    |
| 6  |            |   |            |     |            |   |     |    |
| 2  | 3          | 2 | 2          | 3   | 3          | 3 |     |    |
| 1  | 1          | 1 | 1          |     |            |   |     |    |
| 5  |            |   |            |     |            |   |     |    |
| 9  |            |   |            |     |            |   |     |    |
|    | 7          |   |            | 8   |            |   | 8   |    |
|    | 4          |   |            | 5   |            |   | 6.5 |    |
|    | 6          |   |            | 6.5 |            |   | 7   |    |
| 7  | 8          | 8 | 8          | 7   | 8          | 8 | 10  | 10 |
| 6  | 7          | 7 | 7          | 8   | 8          | 7 | 9   | 8  |
| 3  | 3          | 3 | 3          | 3   | 4          | 3 | 3   | 4  |
| 7  |            |   |            |     |            |   |     |    |
| 3  | 4          | 2 | 3          | 4   | 2          | 3 | 6   | 3  |
| 8  | 9          | 9 | 9          |     |            |   |     |    |
| 3  | 4          | 3 | 3          | 4   | 3          | 3 | 5   | 4  |
| 9  | 9          | 6 | 9          |     |            |   |     |    |
| 4  | 5          | 5 | 4          | 6   | 7          | 6 | 7   | 7  |
| 6  | 8          | 8 | 9          | 9   | 9          | 9 |     |    |
| 5  | 7          | 7 | 7          | 9   | 9          | 9 | 10  | 10 |
| 4  | 5          | 5 | 5          | 6   | 5          | 5 | 6   | 6  |
| 3  |            |   |            |     |            |   |     |    |
| 4  | 10         | 6 | 7          |     |            |   |     |    |
| 5  | 7          | 6 | 7          | 8   | 9          | 9 |     |    |

Supplementary Table 1.

| O   | RPE13min B |    | O  | RPE14min B |   |   | O | RPE15min B |   |
|-----|------------|----|----|------------|---|---|---|------------|---|
|     | 9          | 10 | 9  | 10         |   |   |   |            |   |
|     | 6          | 8  | 6  | 7          | 9 | 7 | 8 |            |   |
|     | 9          | 10 | 10 | 10         |   |   |   |            |   |
|     |            | 9  |    |            |   |   |   |            |   |
|     |            | 8  |    |            | 9 |   |   | 9          |   |
| 10  |            | 9  | 9  | 9          |   |   |   |            |   |
| 8.5 |            |    |    |            |   |   |   |            |   |
|     | 4          | 4  | 4  | 4          | 5 | 5 | 5 | 5          | 6 |
|     | 4          | 7  | 5  | 7          | 9 | 8 | 9 |            |   |
|     | 4          | 7  | 4  | 5          | 7 | 4 | 5 |            |   |
|     | 7          | 8  | 9  | 8          |   |   |   |            |   |
| 10  |            |    |    |            |   |   |   |            |   |
|     | 6          | 7  | 7  | 7          | 7 | 8 | 8 | 9          | 9 |
|     |            |    |    |            |   |   |   |            |   |

Supplementary Table 1.

| <b>O</b> | <b>RPE16min B</b> | <b>O</b> | <b>RPE17Legs B</b> | <b>O</b> | <b>RPE18Legs B</b> |   |   |   |
|----------|-------------------|----------|--------------------|----------|--------------------|---|---|---|
|          | 9                 |          |                    |          |                    |   |   |   |
| 6        | 6                 | 7        | 7                  | 7        | 8                  | 8 | 8 | 8 |
| 9        |                   |          |                    |          |                    |   |   |   |
|          |                   |          |                    |          |                    |   |   |   |





Supplementary Table 1.

| O | Post3min | B | O  | HR1min | HR2min | HR3min | HR4min | HR5min |     |
|---|----------|---|----|--------|--------|--------|--------|--------|-----|
|   |          |   |    |        | 93     | 106    | 112    | 109    | 128 |
|   | 5        | 3 | 1  | 3      | 85     | 94     | 93     | 106    | 117 |
|   |          |   |    |        | 84     | 94     | 103    | 113    | 123 |
|   | 6        | 6 | 2  | 4      | 92     | 98     | 98     | 107    | 107 |
|   | 10       | 3 | 10 | 10     | 92     | 82     | 94     | 107    | 117 |
|   |          |   |    |        | 81     | 92     | 93     | 86     |     |
|   | 5        |   |    |        | 103    | 105    | 108    | 116    | 129 |
|   | 8        | 7 | 6  | 6      | 82     | 113    | 113    | 123    | 127 |
|   | 2        | 1 | 2  | 1      | 100    | 140    | 135    | 144    | 151 |
|   | 7        | 6 | 6  | 6      | 91     | 113    | 103    | 111    | 112 |
|   |          |   |    |        | 71     | 110    | 106    | 113    | 119 |
|   | 1        | 2 | 1  | 1      | 96     | 105    | 105    | 116    | 120 |
|   | 1        | 1 | 1  | 1      | 140    | 139    | 137    | 162    | 192 |
|   | 1        | 2 | 2  | 1      | 115    | 121    | 147    | 161    | 158 |
|   | 5        | 8 | 6  | 6      | 101    | 114    | 120    | 132    | 145 |
|   | 4        | 2 | 1  | 1      | 112    | 119    | 127    | 134    | 149 |
|   |          |   |    |        |        |        |        |        |     |
|   |          |   |    |        | 91     | 111    | 117    | 119    |     |
|   |          |   |    |        | 97     | 101    | 102    | 106    | 112 |
|   |          |   |    |        | 109    | 109    | 109    | 115    | 127 |
|   | 10       | 6 | 9  | 1      | 88     | 89     | 96     | 127    | 124 |
|   | 5        | 5 | 4  | 4      | 75     | 74     | 85     | 88     | 95  |
|   | 8        | 3 | 2  | 2      | 126    | 133    | 146    | 155    | 164 |
|   | 5        | 2 | 2  | 2      | 85     | 106    | 102    | 101    | 104 |
|   | 6        | 2 | 4  | 3      | 89     | 101    | 108    | 119    | 126 |
|   | 3        | 1 | 1  | 1      | 98     | 123    | 122    | 124    | 129 |
|   | 6        | 6 | 3  | 4      |        |        |        |        |     |
|   |          |   |    |        |        |        |        | 117    | 125 |
|   | 5        | 5 | 2  | 3      | 109    | 117    | 116    | 117    | 122 |
|   | 5        |   |    |        | 118    | 125    | 129    | 128    |     |
|   | 0        |   |    |        | 106    | 109    | 121    | 127    | 140 |
|   |          |   |    |        | 80     | 98     | 103    | 107    | 117 |
|   | 1        | 1 | 1  | 1      | 90     | 120    | 131    | 131    | 131 |
| \ | \        | \ | \  |        | 92     | 98     | 108    | 110    | 125 |
|   | 8        |   |    |        | 92     | 125    | 127    | 129    | 150 |
|   | 5        | 2 | 5  | 9      | 109    | 115    | 118    | 123    | 124 |
|   | 2        | 3 | 2  | 1      | 100    | 106    | 108    | 117    | 118 |
|   | 6        | 8 | 5  | 6      | 111    | 129    | 123    | 124    | 130 |

Supplementary Table 1.

| HR6min | HR7min | HR8min | HR9min | HR10min | HR11min | HR12min | HR13min | HR14min |
|--------|--------|--------|--------|---------|---------|---------|---------|---------|
| 135    | 140    | 158    |        |         |         |         |         |         |
| 123    | 132    | 139    | 150    | 158     | 172     | 179     | 183     | 191     |
| 132    | 142    | 159    |        |         |         |         |         |         |
| 125    | 125    | 136    | 145    | 148     | 160     | 170     | 180     | 190     |
| 130    |        |        |        |         |         |         |         |         |
| 135    | 145    | 154    | 161    | 173     | 181     | 189     |         |         |
| 147    | 152    |        |        |         |         |         |         |         |
| 155    | 176    | 179    | 180    |         |         |         |         |         |
| 122    | 110    |        |        |         |         |         |         |         |
| 132    | 142    | 163    | 177    | 183     | 197     |         |         |         |
| 121    | 130    | 134    |        |         |         |         |         |         |
| 200    |        |        | 200    | 201     |         |         |         |         |
| 172    | 185    | 189    | 192    |         |         |         |         |         |
| 156    | 165    |        |        |         |         |         |         |         |
| 155    |        |        |        | 169     |         |         |         |         |
| 139    | 149    | 161    | 172    | 178     | 187     | 191     |         |         |
| 118    | 121    | 130    | 140    | 142     | 153     | 167     | 171     |         |
| 144    | 146    | 151    | 157    | 164     | 168     | 173     | 178     | 182     |
| 131    | 139    | 144    | 147    | 161     | 171     | 178     |         |         |
| 107    | 127    | 136    | 154    | 163     | 172     | 180     | 183     | 187     |
| 170    | 178    | 188    |        |         |         |         |         |         |
| 116    | 118    | 127    | 131    | 139     | 144     | 150     | 156     | 155     |
| 139    | 151    | 168    | 178    |         |         |         |         |         |
| 137    | 147    | 151    | 167    | 168     | 179     | 186     | 192     | 197     |
| 127    | 135    | 147    | 154    | 159     | 175     | 182     | 186     |         |
| 130    | 137    | 139    | 147    | 155     |         |         |         |         |
| 135    | 142    | 161    | 171    | 188     | 197     | 205     | 206     |         |
| 150    | 159    | 176    | 185    | 193     | 201     | 173     | 161     | 140     |
| 131    | 142    | 151    | 170    | 182     | 188     | 194     |         |         |
| 146    | 152    | 162    |        |         |         |         |         |         |
| 128    | 130    | 144    | 146    | 157     | 166     | 175     | 177     | 183     |
| 152    |        |        |        |         |         |         |         |         |
| 141    | 152    | 162    | 172    |         |         |         |         |         |
| 130    | 137    | 144    | 161    | 167     |         |         |         |         |
| 138    | 155    | 164    | 164    | 178     | 179     |         |         |         |

Supplementary Table 1.

| HR15min | HR16min | HR17min | HR18min | HR19min | HR20min | Post1min | Post3min | HI            |
|---------|---------|---------|---------|---------|---------|----------|----------|---------------|
|         |         |         |         |         |         |          |          | 17/12/13      |
|         |         |         |         |         |         | 114      |          | 18/02/20:     |
|         |         |         |         |         |         | 128      | 103      | 41762         |
|         |         |         |         |         |         |          |          | 41765         |
| 196     |         |         |         |         |         | 145      | 122      | 15/03/14      |
|         |         |         |         |         |         | 77       | 60       | 15/04/14      |
|         |         |         |         |         |         | \        | \        | 17/07/20:     |
|         |         |         |         |         |         | 154      |          | 41856         |
|         |         |         |         |         |         | 120      | 94       | 13/06/14      |
|         |         |         |         |         |         | 135      | 105      | 19/07/20:     |
|         |         |         |         |         |         | 91       | 80       | 15/05/14      |
|         |         |         |         |         |         |          |          | 41954         |
|         |         |         |         |         |         | 88       | 87       | 41894         |
|         |         |         |         |         |         |          |          | 115 27/01/20: |
|         |         |         |         |         |         | 170      | 142      | 16/12/20:     |
|         |         |         |         |         |         | 138      | 111      | 42066         |
|         |         |         |         |         |         | 139      | 121      | 14/04/20:     |
|         |         |         |         |         |         |          |          | 17/12/13      |
|         |         |         |         |         |         |          |          | 41731         |
| 187     |         |         |         |         |         |          |          | 41793         |
|         |         |         |         |         |         | 136      | 93       | 25/02/14      |
|         |         |         |         |         |         | 134      | 97       | 27/02/14      |
|         |         |         |         |         |         | 178      | 125      | 41793         |
| 155     | 169     | 168     | 180     | 182     | 185     | 122      | 86       | 23/03/14      |
|         |         |         |         |         |         | 113      | 84       | 27/03/14      |
|         |         |         |         |         |         | 160      | 125      | 25/03/14      |
|         |         |         |         |         |         |          |          | 41794         |
|         |         |         |         |         |         | 116      | 110      | 24/04/14      |
|         |         |         |         |         |         | 135      | 120      | 17/04/14      |
|         |         |         |         |         |         | 176      | 159      | 16/04/14      |
|         |         |         |         |         |         | 88       |          | 27/04/14      |
|         |         |         |         |         |         | 141      | 128      | 41188         |
|         |         |         |         |         |         | 142      | 112      | 16/09/20:     |
| 190     |         |         |         |         |         |          |          |               |
|         |         |         |         |         |         | 105      |          | 21/10/20:     |
|         |         |         |         |         |         | 131      | 109      | 24/02/20:     |
|         |         |         |         |         |         | 141      | 127      | 16/04/20:     |
|         |         |         |         |         |         | 166      | 145      |               |

Supplementary Table 1.

| WATTS | RPE0 | B | O | RPE5 | B  | O  | RPE10 | B  |    |
|-------|------|---|---|------|----|----|-------|----|----|
| 160   |      | 1 |   |      | 5  |    |       | 5  |    |
| 140   |      | 1 | 1 | 1    | 4  | 4  | 4     | 5  | 5  |
| 280   |      | 1 | 1 | 1    | 3  | 2  | 3     | 5  | 3  |
| 140   |      | 1 | 1 | 1    | 3  | 3  | 4     | 6  | 5  |
| 260   |      | 1 | 1 | 1    | 1  | 3  | 2     | 3  | 4  |
| 75    |      | 1 | 1 | 1    | 10 | 10 | 10    | 10 | 10 |
| 60    |      | 3 | 1 | 2    | 4  | 1  | 3     | 5  | 2  |
| 11    |      | 1 | 1 | 1    | 3  | 3  | 3     | 4  | 4  |
| 120   |      | 1 | 1 | 1    | 3  | 2  | 2     | 3  | 2  |
| 160   |      | 1 | 1 | 1    | 3  | 2  | 2     | 5  | 3  |
| 160   |      | 1 | 1 | 1    | 3  | 3  | 3     | 4  | 4  |
| 180   |      | 1 | 1 | 1    | 1  | 2  | 1     | 1  | 2  |
| 105   |      | 1 | 1 | 1    | 4  | 4  | 4     | 7  | 7  |
| 180   |      | 1 | 1 | 1    | 1  | 1  | 1     | 1  | 1  |
| 160   |      | 1 | 1 | 1    | 3  | 1  | 1     | 5  | 2  |
| 120   |      | 1 | 1 | 1    | 5  | 3  | 3     | 7  | 5  |
| 160   |      | 1 | 1 | 1    | 5  | 4  | 4     | 5  | 4  |
| 260   |      | 3 |   |      | 3  |    |       | 4  |    |
| 240   |      | 1 |   |      | 3  |    |       | 7  |    |
| 300   |      | 1 | 1 | 1    | 5  | 3  | 4     | 5  | 4  |
| 240   |      | 1 | 2 | 1    | 10 | 6  | 10    | 10 | 10 |
| 240   |      | 1 | 1 | 1    | 4  | 3  | 4     | 6  | 5  |
| 200   |      | 1 | 1 | 1    | 4  | 4  | 4     | 5  | 5  |
| 380   |      | 1 | 1 | 1    | 1  | 2  | 1     | 2  | 3  |
| 160   |      | 1 | 1 | 1    | 4  | 5  | 5     | 6  | 7  |
| 260   |      | 1 | 1 | 1    | 4  | 2  | 3     | 5  | 2  |
| 160   |      | 1 | 1 | 1    | 5  | 4  | 4     | 6  | 6  |
| 260   |      | 1 | 1 | 1    | 2  | 1  | 2     | 3  | 2  |
| 180   |      | 2 | 2 | 2    | 3  | 3  | 3     | 5  | 5  |
| 240   |      | 1 | 1 | 1    | 3  | 3  | 3     | 3  | 3  |
| 220   |      | 1 | 1 | 1    | 3  | 3  | 3     | 4  | 5  |
| 220   |      | 1 | 1 | 1    | 4  | 4  | 4     | 5  | 5  |
| 140   |      | 1 | 1 | 1    | 3  | 2  | 3     | 4  | 2  |
|       |      | 1 | 1 | 1    | 3  | 2  | 2     | 4  | 3  |
| 60    |      | 2 | 2 | 2    | 6  | 5  | 7     | 8  | 9  |
| 160   |      | 3 | 4 | 7    | 8  | 5  | 7     | 7  | 8  |
| 180   |      | 1 | 1 | 1    | 3  | 2  | 1     | 6  | 3  |

Supplementary Table 1.

| O  | RPE15 | B  | O  | RPE20 | B  | O  | RPE25 | B   |
|----|-------|----|----|-------|----|----|-------|-----|
|    |       | 5  |    |       | 6  |    |       | 6   |
| 5  | 5     | 5  | 5  | 5     | 6  | 5  | 6     | 6.5 |
| 5  | 7     | 7  | 5  | 7     | 8  | 6  | 8     | 9   |
| 7  | 7     | 7  | 6  | 8     | 8  | 7  | 9     | 9   |
| 4  | 5     | 5  | 5  | 5     | 6  | 5  | 6     | 7   |
| 10 | 10    | 10 | 10 | 10    | 10 | 10 | 10    | 10  |
| 3  | 5     | 2  | 2  | 4     | 6  | 3  | 4     | 6   |
| 4  | 5     | 5  | 5  | 5     | 5  | 5  | 5     | 6   |
| 4  | 3     | 2  | 2  | 4     | 8  | 9  | 9     | 10  |
| 4  | 6     | 4  | 4  | 5     | 7  | 4  | 5     | 8   |
| 4  | 5     | 5  | 5  | 5     | 7  | 7  | 7     | 10  |
| 1  | 2     | 2  | 2  | 2     | 2  | 2  | 3     | 2   |
| 7  | 8     | 8  | 8  | 8     | 9  | 7  | 8     | 9   |
| 1  | 2     | 2  | 2  | 2     | 2  | 2  | 1     | 1   |
| 2  | 6     | 3  | 3  | 2     | 7  | 1  | 1     | 7   |
| 5  | 8     | 6  | 6  | 6     | 9  | 7  | 7     | 9   |
| 5  | 6     | 4  | 4  | 5     | 8  | 6  | 7     |     |
|    | 4.5   |    |    |       | 6  | 6  | 5     | 4   |
|    | 9     |    |    |       |    |    |       |     |
| 5  | 7     | 4  | 4  | 5     | 8  | 5  | 7     | 9   |
| 10 | 10    | 9  | 9  | 10    | 10 | 10 | 10    | 10  |
| 5  | 6     | 6  | 6  | 6     | 7  | 6  | 6     | 7   |
| 5  | 7     | 5  | 5  | 6     | 8  | 6  | 8     | 8   |
| 2  | 3     | 3  | 3  | 3     | 3  | 5  | 4     | 5   |
| 6  | 7     | 9  | 9  | 8     | 8  | 7  | 9     | 9   |
| 3  | 5     | 3  | 3  | 4     | 6  | 3  | 4     | 5   |
| 6  | 6     | 5  | 5  | 6     | 7  | 6  | 7     | 7   |
| 3  | 3     | 3  | 3  | 3     | 5  | 4  | 4     | 6   |
| 4  | 6     | 5  | 5  | 4     | 7  | 5  | 5     | 7   |
| 3  | 4     | 5  | 5  | 5     | 5  | 5  | 5     | 6   |
| 5  | 5     | 6  | 6  | 6     | 6  | 7  | 7     | 7   |
| 5  | 7     | 7  | 7  | 7     | 6  | 7  | 6     | 8   |
| 3  | 4     | 4  | 4  | 4     | 5  | 3  | 4     | 6   |
| 3  | 5     | 4  | 4  | 4     | 6  | 5  | 5     | 6   |
| 8  | 9     | 9  | 9  | 9     |    |    |       |     |
| 5  | 8     | 5  | 5  | 9     | 6  | 4  | 7     | 7   |
| 4  | 4     | 4  | 4  | 3     | 5  | 3  | 4     | 5   |

Supplementary Table 1.

| O  | RPE30 | B  | O  | RPEPost1 | B  | O  | RPEPost3 | B  |   |
|----|-------|----|----|----------|----|----|----------|----|---|
|    |       | 6  |    |          | 1  |    |          |    |   |
| 6  | 7     | 7  | 6  | 7        | 7  | 7  | 7        | 6  | 5 |
| 9  | 9     | 9  | 7  | 9        | 8  | 4  | 8        | 7  | 2 |
| 9  | 8     | 8  | 7  | 8        | 5  | 3  | 3        | 2  | 1 |
| 7  | 7     | 7  | 6  | 7        | 6  | 4  | 5        | 5  | 2 |
| 10 | 10    | 10 | 10 | 10       | 10 | 10 | 10       | 10 | 1 |
| 4  | 7     | 2  | 4  | 4        | 6  | 1  | 3        | 5  | 2 |
| 6  | 6     | 6  | 6  | 6        | 6  | 5  | 5        | 4  | 3 |
| 10 | 10    | 10 | 10 | 10       | 7  | 10 | 10       | 3  | 3 |
| 6  | 8     | 5  | 6  | 6        | 5  | 6  | 6        | 1  | 3 |
| 10 | 10    | 10 | 10 | 10       | 8  | 8  | 8        | 7  | 6 |
| 3  | 3     | 3  | 3  | 3        | 3  | 3  | 3        | 3  | 3 |
| 9  | 9     | 8  | 8  | 8        | 8  | 5  | 7        | 6  | 4 |
| 2  | 2     | 2  | 2  | 2        | 1  | 1  | 1        | 1  | 1 |
| 3  | 8     | 5  | 2  | 2        | 9  | 1  | 1        | 8  | 1 |
| 8  | 10    | 8  | 8  | 8        | 10 | 8  | 8        | 8  | 6 |
|    |       |    |    |          | 4  | 1  | 3        | 1  | 1 |
|    | 5     | 4  | 5  | 5        | 1  |    |          |    |   |
|    | 9     | 9  | 9  | 9        | 1  |    |          |    |   |
| 7  | 8     | 4  | 4  | 6        | 6  | 3  | 4        | 3  | 1 |
| 10 | 10    | 10 | 10 | 10       | 9  | 9  | 10       | 10 | 9 |
| 7  | 8     | 8  | 8  | 8        | 6  | 5  | 5        | 4  | 2 |
| 8  | 7     | 6  | 7  | 7        | 7  | 5  | 5        | 3  | 2 |
| 5  | 6     | 7  | 6  | 6        | 6  | 6  | 6        | 6  | 6 |
| 10 | 9     | 8  | 9  | 9        |    |    |          | 2  | 1 |
| 4  | 7     | 4  | 4  | 5        | 6  | 3  | 4        | 5  | 1 |
| 7  | 7     | 5  | 5  | 6        | 7  | 4  | 6        | 6  | 2 |
| 5  | 6     | 5  | 5  | 5        | 3  | 2  | 2        | 3  | 1 |
| 6  | 6     | 6  | 6  | 5        | 5  | 5  | 4        | 4  | 3 |
| 7  | 7     | 7  | 7  | 7        | 6  | 6  | 6        | 2  | 2 |
| 8  | 8     | 9  | 9  | 9        | 5  | 7  | 6        | 5  | 5 |
| 8  | 9     | 9  | 9  | 9        | 9  | 9  | 9        | 2  | 1 |
| 5  | 7     | 5  | 6  | 6        | 2  | 1  | 1        | 1  | 1 |
| 6  | 7     | 6  | 6  | 6        | 5  | 5  | 5        | 5  | 3 |
|    | 9     | 9  | 9  | 9        | 9  | 10 | 10       | 10 | 8 |
| 4  | 8     | 4  | 4  | 9        | 5  | 8  | 7        | 6  | 5 |
| 4  | 3     | 4  | 3  | 3        | 3  | 2  | 3        | 3  | 1 |

Supplementary Table 1.

| O  | RPEpost7 | B | O | HR0 | HR5 | HR10 | HR15 | HR20 |     |
|----|----------|---|---|-----|-----|------|------|------|-----|
|    |          |   |   |     | 112 | 162  | 163  | 163  | 180 |
|    | 5        |   |   |     | 73  | 140  | 155  | 152  | 139 |
|    | 7        | 7 | 1 | 7   | 79  | 156  | 166  | 174  | 176 |
|    | 2        | 1 | 1 | 1   | 83  | 123  | 143  | 125  | 140 |
|    | 4        | 4 | 1 | 2   | 59  | 155  | 161  | 170  | 176 |
| 10 | 1        |   | 1 | 1   | 75  | 110  | 102  | 106  | 118 |
|    | 3        | 3 | 2 | 3   | 86  | 107  | 106  | 104  | 110 |
|    | 3        | 2 | 1 | 1   | 85  | 146  | 142  | 153  | 149 |
|    | 3        | 4 | 3 | 3   | 110 | 138  | 151  | 153  | 151 |
|    | 3        | 1 | 1 | 1   | 92  | 162  | 162  | 159  | 158 |
|    | 6        | 5 | 5 | 5   | 96  | 115  | 118  | 131  | 136 |
|    | 3        | 2 | 2 | 2   | 105 | 157  | 146  | 152  | 163 |
|    | 5        | 5 | 3 | 4   | 93  | 123  | 133  | 136  | 136 |
|    | 1        | 1 | 1 | 1   | 63  | 157  | 143  | 151  | 152 |
|    | 1        | 1 | 1 | 1   | 109 | 145  | 168  | 179  | 175 |
|    | 6        | 6 | 3 | 3   | 71  | 140  | 146  | 136  | 140 |
|    | 1        | 1 | 1 | 1   | 100 | 162  | 188  | 191  | 147 |
|    |          |   |   |     | 106 | 167  | 166  | 168  | 168 |
|    |          |   |   |     | 103 | 162  | 160  | 139  |     |
|    | 2        | 2 | 1 | 1   | 97  | 159  | 162  | 164  | 170 |
| 10 |          |   |   |     | 76  | 156  | 158  | 147  | 161 |
|    | 3        |   |   |     | 71  | 159  | 179  | 171  | 176 |
|    | 2        | 2 | 1 | 2   | 94  | 180  | 182  | 180  | 181 |
|    | 6        | 4 | 4 | 4   | 91  | 161  | 167  | 164  | 168 |
|    | 2        | 1 | 1 | 1   | 91  | 160  | 161  | 161  | 162 |
|    | 3        | 2 | 1 | 1   | 79  | 162  | 171  | 166  | 171 |
|    | 4        | 4 | 1 | 2   | 87  | 182  | 184  | 187  | 185 |
|    | 2        | 2 | 1 | 1   | 102 | 161  | 157  | 172  | 173 |
|    | 3        | 2 | 2 | 2   | 98  | 126  | 123  | 135  | 137 |
|    | 2        | 1 | 1 | 1   | 102 | 174  | 191  | 194  | 189 |
|    | 5        | 3 | 4 | 3   | 112 | 194  | 200  | 188  | 197 |
|    | 2        | 1 | 1 | 1   | 93  | 171  | 178  | 175  | 185 |
|    | 1        | 1 | 1 | 1   | 91  | 137  | 163  | 154  | 161 |
|    | 4        | 5 | 3 | 3   | 76  | 145  | 158  | 159  | 160 |
|    | 9        | 9 | 7 | 8   | 108 | 156  | 148  | 149  |     |
|    | 7        | 7 | 4 | 9   | 105 | 145  | 163  | 155  | 158 |
|    | 2        | 2 | 1 | 2   | 98  | 144  | 148  | 150  | 155 |
|    |          |   |   |     | 142 | 170  | 178  | 178  | 181 |



Supplementary Table 1.

| HR25 | HR30 | HR AVG  | %HR Chang | HRPost1mi | HRPost3mi | HRPost7 | %HRP1   | %HRP3   |
|------|------|---------|-----------|-----------|-----------|---------|---------|---------|
| 179  | 183  | 163.143 | 83.663    |           |           |         | 0       | 0       |
| 144  | 155  | 136.857 | 82.9437   | 135       | 115       |         | 184.932 | 157.534 |
| 181  | 185  | 159.571 | 83.5453   | 165       | 118       | 106     | 208.861 | 149.367 |
| 137  | 146  | 128.143 | 80.593    | 101       | 90        | 81      | 121.687 | 108.434 |
| 179  | 180  | 154.286 | 78.7172   | 165       | 122       | 118     | 279.661 | 206.78  |
| 117  | 126  | 107.714 | 80.9882   | 117       | 93        | 75      | 156     | 124     |
| 103  | 108  | 103.429 |           | 86        | 69        | 79      | 100     | 80.2326 |
| 158  | 165  | 142.571 | 73.8712   | 151       | 112       | 105     | 177.647 | 131.765 |
| 144  | 149  | 142.286 | 96.139    | 118       | 110       | 86      | 107.273 | 100     |
| 158  | 176  | 152.429 | 84.6825   | 122       | 103       | 98      | 132.609 | 111.957 |
| 124  | 133  | 121.857 | 100.708   | 111       | 101       | 96      | 115.625 | 105.208 |
| 166  | 160  | 149.857 | 76.0696   | 147       | 103       | 98      | 140     | 98.0952 |
| 139  | 132  | 127.429 | 94.3915   | 129       | 102       | 127     | 138.71  | 109.677 |
| 139  | 148  | 136.143 |           | 114       | 108       | 119     | 180.952 | 171.429 |
| 189  | 182  | 163.857 | 84.9001   | 148       | 140       | 134     | 135.78  | 128.44  |
| 132  | 130  | 127.857 |           | 93        | 92        | 91      | 130.986 | 129.577 |
|      |      | 157.6   |           | 144       | 130       | 110     | 144     | 130     |
| 169  | 170  | 159.143 | 81.6117   | 138       |           |         | 130.189 | 0       |
|      |      | 141     | 82.9412   | 130       |           |         | 126.214 | 0       |
| 164  | 170  | 155.143 | 85.2433 ? | ?         | ?         | ?       |         |         |
| 159  | 160  | 145.286 | 81.6212   | 124       | 93        |         | 163.158 | 122.368 |
| 177  | 185  | 159.714 | 85.4087   | 154       | 128       |         | 216.901 | 180.282 |
| 185  | 189  | 170.143 | 90.5015   | 159       | 130       | 115     | 169.149 | 138.298 |
| 180  | 175  | 158     | 85.4054   | 147       | 139       | 106     | 161.538 | 152.747 |
| 162  | 166  | 151.857 | 85.313    |           | 81        | 74      | 0       | 89.011  |
| 173  | 183  | 157.857 | 80.1305   | 159       | 138       | 116     | 201.266 | 174.684 |
| 193  | 205  | 174.714 | 93.4301   | 197       | 132       | 119     | 226.437 | 151.724 |
| 177  | 176  | 159.714 | 85.8679   | 137       | 106       | 101     | 134.314 | 103.922 |
| 143  | 143  | 129.286 | 82.3476   | 133       | 116       | 101     | 135.714 | 118.367 |
| 198  | 198  | 178     | 88.5572   | 184       | 134       | 129     | 180.392 | 131.373 |
| 185  | 199  | 182.143 | 82.7922   | 163       | 116       | 121     | 145.536 | 103.571 |
| 180  | 182  | 166.286 |           | 130       | 101       | 93      | 139.785 | 108.602 |
| 160  | 171  | 148.143 | 91.4462   | 144       | 120       | 120     | 158.242 | 131.868 |
| 158  | 160  | 145.143 | 82.0016   | 150       | 85        | 79      | 197.368 | 111.842 |
|      |      | 140.25  | 94.1275   | 121       | 108       | 100     | 112.037 | 100     |
| 160  | 160  | 149.429 |           | 114       | 112       | 109     | 108.571 | 106.667 |
| 151  | 155  | 143     |           | 118       | 105       | 106     | 120.408 | 107.143 |
| 182  | 185  | 173.714 |           |           |           |         | 0       | 0       |

Supplementary Table 1.

| %HRP7 | %HRAvg  | BP      | HR     | LI Watts | RPE0 | B   | O | RPE5 |   |
|-------|---------|---------|--------|----------|------|-----|---|------|---|
|       | 0       | 145.663 | 119/61 |          | 78   |     |   |      | 3 |
|       | 0       | 187.476 | 110/69 |          | 85   |     |   |      | 3 |
|       | 134.177 | 201.989 | 131/72 |          | 80   | 140 |   |      | 2 |
|       | 97.5904 | 154.389 | 118/81 |          | 70   | 70  |   |      | 5 |
|       | 200     | 261.501 | 112/61 |          | 53   | 130 |   |      | 3 |
|       | 100     | 143.619 | 90/39  |          | 56   | 38  |   |      | 7 |
|       | 91.8605 | 120.266 | 145/64 |          | 72   | 30  |   |      | 4 |
|       | 123.529 | 167.731 | 133/75 |          | 65   | 110 |   |      | 2 |
|       | 78.1818 | 129.351 | 115/80 |          | 84   | 60  |   |      | 3 |
|       | 106.522 | 165.683 | 132/73 |          | 94   | 80  |   |      | 2 |
|       | 100     | 126.935 | 135/68 |          | 80   | 80  |   |      | 2 |
|       | 93.3333 | 142.721 | 119/71 |          | 68   | 90  |   |      | 1 |
|       | 136.559 | 137.02  | 121/62 |          | 85   | 53  |   |      | 4 |
|       | 188.889 | 216.1   | 118/55 |          | 85   | 90  |   |      | 2 |
|       | 122.936 | 150.328 | 127/76 | 109      |      | 80  |   |      | 1 |
|       | 128.169 | 180.08  | 125/58 |          | 97   |     |   |      |   |
|       | 110     | 157.6   | 110/60 |          | 92   | 80  |   |      | 4 |
|       | 0       | 150.135 | 124/73 |          | 66   |     |   |      | 2 |
|       | 0       | 136.893 | 143/79 |          | 80   |     |   |      | 2 |
|       |         | 159.941 |        |          |      | 150 |   |      | 5 |
|       | 0       | 191.165 | 128/79 |          | 71   | 120 |   |      | 5 |
|       | 0       | 224.95  | 120/68 | 110      |      | 120 |   |      | 3 |
|       | 122.34  | 181.003 | 115/72 |          | 72   | 100 |   |      | 5 |
|       | 116.484 | 173.626 | 128/72 |          | 79   | 190 |   |      | 1 |
|       | 81.3187 | 166.876 | 116/66 |          | 77   | 80  |   |      | 4 |
|       | 146.835 | 199.819 | 125/60 |          | 60   | 130 |   |      | 2 |
|       | 136.782 | 200.821 | 103/71 |          | 89   | 80  |   |      | 3 |
|       | 99.0196 | 156.583 | 99/58  |          | 88   | 130 |   |      | 1 |
|       | 103.061 | 131.924 | 115/68 |          | 89   | 90  |   |      | 3 |
|       | 126.471 | 174.51  | 123/60 |          | 76   | 120 |   |      | 1 |
|       | 108.036 | 162.628 | 133/59 |          | 79   | 110 |   |      | 2 |
|       | 100     | 178.802 | 102/50 |          | 72   | 110 |   |      | 3 |
|       | 131.868 | 162.794 | 134/70 |          | 88   | 70  |   |      |   |
|       | 103.947 | 190.977 | 113/74 |          | 64   | 140 |   |      | 4 |
|       | 92.5926 | 129.861 | 99/55  |          | 99   | 30  |   |      | 5 |
|       | 103.81  | 142.313 | 133/77 |          | 90   | 80  |   |      | 4 |
|       | 108.163 | 145.918 | 116/68 |          | 88   | 90  |   |      | 2 |
|       | 0       | 122.334 |        |          |      |     |   |      |   |

Supplementary Table 1.

|   | RPE10 | B  | O | RPE15 | B  | O  | RPE20 |    |
|---|-------|----|---|-------|----|----|-------|----|
|   |       | 5  |   |       | 5  |    |       | 6  |
| 2 | 3     | 5  | 4 | 5     | 7  | 5  | 6     | 8  |
| 1 | 2     | 4  | 3 | 4     | 6  | 5  | 6     | 7  |
| 5 | 7     | 8  | 9 | 9     | 9  | 10 | 10    | 10 |
| 1 | 2     | 4  | 1 | 3     | 4  | 1  | 3     | 5  |
| 7 | 7     | 10 | 5 | 5     | 10 | 10 | 10    | 10 |
| 3 | 4     | 6  | 4 | 7     | 7  | 5  | 7     | 8  |
| 3 | 3     | 4  | 4 | 4     | 5  | 5  | 5     | 6  |
| 2 | 3     | 3  | 5 | 5     | 6  | 7  | 9     | 6  |
| 1 | 2     | 1  | 3 | 3     | 4  | 4  | 4     | 6  |
| 3 | 3     | 3  | 4 | 5     | 5  | 6  | 7     | 8  |
| 1 | 1     | 1  | 2 | 1     | 1  | 1  | 1     | 2  |
| 3 | 4     | 7  | 5 | 6     | 9  | 9  | 9     | 9  |
| 2 | 2     | 2  | 1 | 2     | 3  | 2  | 2     | 2  |
| 2 | 1     | 3  | 2 | 1     | 4  | 3  | 2     | 5  |
| 4 | 4     | 6  | 4 | 5     | 5  | 3  | 4     | 4  |
|   |       | 2  |   |       | 5  |    |       | 4  |
|   |       | 3  |   |       | 4  |    |       | 5  |
|   |       | 6  |   |       | 7  |    |       | 6  |
| 7 | 10    | 8  | 8 | 10    | 9  | 10 | 10    | 10 |
| 2 | 2     | 3  | 3 | 3     | 4  | 3  | 3     | 5  |
| 4 | 5     | 8  | 6 | 8     | 9  | 7  | 9     | 10 |
| 2 | 2     | 1  | 3 | 2     | 2  | 4  | 3     | 4  |
| 3 | 3     | 5  | 5 | 5     | 6  | 7  | 8     | 10 |
| 1 | 1     | 3  | 2 | 1     | 3  | 2  | 1     | 3  |
| 3 | 3     | 5  | 4 | 4     | 6  | 5  | 5     | 6  |
| 1 | 1     | 3  | 1 | 3     | 4  | 2  | 3     | 3  |
| 2 | 3     | 6  | 3 | 6     | 5  | 3  | 4     | 6  |
| 1 | 1     | 1  | 2 | 2     | 3  | 2  | 3     | 3  |
| 1 | 1     | 3  | 2 | 3     | 3  | 3  | 3     | 4  |
| 3 | 3     | 4  | 4 | 4     | 4  | 5  | 4     | 5  |
| 3 | 3     | 4  | 4 | 4     | 4  | 5  | 5     | 6  |
| 4 | 6     | 6  | 7 | 8     | 8  | 9  | 10    | 9  |
| 6 | 3     | 2  | 5 | 7     | 7  | 6  | 4     | 6  |
| 1 | 1     | 2  | 1 | 2     | 3  | 1  | 2     | 4  |

Supplementary Table 1.

| B  | O  | RPE25 | B  | O  | RPE30 | B  | O  | RPEPost1 |
|----|----|-------|----|----|-------|----|----|----------|
|    |    |       | 6  |    |       | 4  | 5  | 4        |
| 6  |    | 7     | 8  | 7  | 8     | 9  | 7  | 8        |
| 5  |    | 7     | 7  | 5  | 7     | 7  | 5  | 7        |
| 10 | 10 | 10    | 10 | 10 | 10    | 10 | 10 | 10       |
| 2  | 4  | 6     | 2  | 5  | 5     | 1  | 4  | 4        |
| 10 | 10 | 10    | 10 | 10 | 10    | 10 | 10 | 10       |
| 5  | 9  | 9     | 5  | 10 | 10    | 5  | 9  | 6        |
| 6  | 6  | 7     | 4  | 6  | 7     | 5  | 6  | 6        |
| 7  | 8  | 8     | 9  | 9  | 9     | 9  | 9  | 10       |
| 5  | 5  | 7     | 6  | 7  | 8     | 7  | 8  | 4        |
| 8  | 9  | 10    | 10 | 10 | 10    | 10 | 10 | 9        |
| 1  | 2  | 2     | 2  | 2  | 2     | 2  | 2  | 1        |
| 9  | 9  | 9     | 9  | 9  | 9     | 9  | 9  | 7        |
| 2  | 2  | 2     | 2  | 2  | 2     | 2  | 3  | 1        |
| 4  | 1  | 7     | 5  | 3  | 8     | 5  | 1  | 5        |
|    |    |       |    |    |       |    |    |          |
| 4  | 4  | 4     | 4  | 4  | 4     | 4  | 4  | 2        |
|    |    |       |    |    |       |    |    |          |
|    |    | 5     |    |    |       | 5  | 5  |          |
|    |    | 5     |    |    |       | 6  | 5  |          |
|    |    | 5.5   |    |    |       | 5  | 6  |          |
| 10 | 9  | 9     | 9  | 9  | 10    | 10 | 10 | 10       |
| 3  | 4  | 5     | 3  | 4  | 6     | 4  | 5  | 5        |
| 7  | 9  | 9     | 7  | 9  | 9     | 7  | 9  | 8        |
| 5  | 4  | 4     | 5  | 5  | 4     | 5  | 4  | 3        |
| 10 | 10 |       |    |    | 10    | 10 | 10 |          |
| 2  | 1  | 4     | 1  | 1  | 4     | 1  | 1  | 3        |
| 5  | 5  | 6     | 5  | 5  | 6     | 5  | 5  | 6        |
| 3  | 3  | 4     | 3  | 3  | 4     | 3  | 3  | 3        |
| 3  | 5  | 4     | 3  | 4  | 3     | 2  | 3  | 2        |
| 3  | 3  | 4     | 3  | 3  | 3     | 3  | 3  | 1        |
| 3  | 3  | 4     | 3  | 4  | 4     | 3  | 3  | 3        |
| 6  | 6  | 7     | 7  | 7  | 8     | 8  | 8  | 7        |
|    |    |       |    |    |       |    |    |          |
| 5  | 5  | 6     | 6  | 6  | 7     | 6  | 6  | 5        |
| 9  | 10 | 9     | 9  | 10 | 9     | 9  | 10 | 5        |
| 8  | 4  | 4     | 7  | 5  | 6     | 4  | 9  | 5        |
| 2  | 3  | 4     | 2  | 4  | 4     | 2  | 3  | 3        |

Supplementary Table 1.

| B  | O  | RPEPost3 | B  | O  | RPEpost7 | B  | O  | HR0 |     |
|----|----|----------|----|----|----------|----|----|-----|-----|
|    |    |          | 1  |    |          |    |    |     | 105 |
| 8  | 8  | 8        | 6  | 5  | 5        | 5  | 3  | 5   | 93  |
| 3  | 6  | 6        | 6  | 1  | 4        |    |    |     | 73  |
| 7  | 5  | 7        | 7  | 6  | 5        | 1  | 1  | 1   | 79  |
| 1  | 3  | 4        | 4  | 1  | 3        | 1  | 1  | 1   | 106 |
| 1  | 1  | 1        | 1  | 1  | 1        | 1  | 1  | 1   | 64  |
| 4  | 5  | 6        | 6  | 4  | 5        | 3  | 3  | 3   | 106 |
| 5  | 5  | 4        | 4  | 1  | 2        | 2  | 1  | 1   | 94  |
| 8  | 8  | 10       | 10 | 9  | 7        | 6  | 2  | 6   | 91  |
| 3  | 4  | 1        | 1  | 2  | 1        | 1  | 1  | 1   | 155 |
| 9  | 9  | 10       | 10 | 10 | 10       | 9  | 9  | 9   | 101 |
| 1  | 1  | 1        | 1  | 1  | 1        | 1  | 1  | 1   | 89  |
| 8  | 8  | 6        | 6  | 1  | 4        | 6  | 1  | 3   | 99  |
| 1  | 1  | 1        | 1  | 1  | 1        | 1  | 1  | 1   | 105 |
| 1  | 1  | 4        | 4  | 1  | 1        | 7  | 1  | 1   | 109 |
| 1  | 1  | 1        | 1  | 1  | 1        | 1  | 1  | 1   | 101 |
|    |    | 1        |    |    |          |    |    |     | 139 |
|    |    | 1        |    |    |          |    |    |     | 117 |
|    |    |          |    |    |          |    |    |     | 162 |
| 10 | 10 | 10       | 10 | 10 | 10       | 10 | 10 | 10  | 75  |
| 2  | 3  | 4        | 4  | 1  | 2        |    |    |     | 87  |
| 5  | 7  | 6        | 6  | 3  | 4        |    |    |     | 93  |
| 4  | 3  | 4        | 4  | 3  | 3        | 4  | 2  | 2   | 88  |
|    |    |          |    |    |          |    |    |     | 82  |
| 1  | 1  | 3        | 3  | 1  | 1        | 2  | 1  | 1   | 95  |
| 5  | 5  | 6        | 6  | 3  | 4        | 4  | 2  | 3   | 97  |
| 3  | 2  | 2        | 2  | 1  | 1        | 1  | 1  | 1   | 64  |
| 1  | 2  | 2        | 2  | 1  | 1        | 1  | 1  | 1   | 85  |
| 2  | 2  | 1        | 1  | 1  | 1        | 1  | 1  | 1   | 78  |
| 2  | 2  | 3        | 3  | 2  | 2        | 3  | 1  | 1   | 91  |
| 4  | 5  | 4        | 4  | 1  | 2        | 1  | 1  | 1   | 98  |
| 4  | 4  | 4        | 4  | 3  | 3        | 3  | 2  | 2   | 109 |
| 6  | 8  | 4        | 4  | 4  | 4        | 7  | 7  | 7   | 121 |
| 3  | 6  | 6        | 6  | 7  | 5        | 7  | 1  | 8   | 88  |
| 1  | 2  | 2        | 2  | 1  | 3        | 2  | 1  | 1   | 97  |

Supplementary Table 1.

| HR5 | HR10 | HR15 | HR20 | HR25 | HR30 | HR AVG  | %HR Chang | HRPost1 |
|-----|------|------|------|------|------|---------|-----------|---------|
| 151 | 157  | 163  | 163  | 160  | 159  | 151.143 | 77.5092   | 142     |
| 125 | 135  | 140  | 143  | 140  | 141  | 131     | 79.3939   | 119     |
| 143 | 156  | 164  | 164  | 169  | 173  | 148.857 | 77.9357   | 139     |
| 120 | 122  | 123  | 118  | 118  | 125  | 115     | 72.327    | 92      |
| 153 | 160  | 164  | 167  | 166  | 169  | 155     | 79.0816   | 152     |
| 125 | 124  | 135  | 130  | 137  | 131  | 120.857 | 90.87     | 113     |
| 97  | 92   | 95   | 100  | 102  | 98   | 98.5714 |           | 89      |
| 134 | 132  | 132  | 136  | 134  | 139  | 128.714 | 66.6913   | 130     |
| 136 | 128  | 122  | 136  | 131  | 134  | 125.429 | 84.749    | 118     |
| 153 | 153  | 152  | 160  | 156  | 174  | 157.571 | 87.5397   | 127     |
| 126 | 122  | 120  | 123  | 127  | 125  | 120.571 | 99.6458   | 104     |
| 131 | 135  | 133  | 139  | 143  | 139  | 129.857 |           | 109     |
| 128 | 124  | 121  | 117  | 120  | 119  | 118.286 |           | 99      |
| 128 | 130  | 130  | 134  | 125  | 131  | 126.143 |           | 93      |
| 162 | 164  | 167  | 169  | 169  | 170  | 158.571 |           | 164     |
| 167 | 177  | 174  | 75   | 174  | 190  | 151.143 |           | 145     |
| 159 | 159  | 160  | 160  | 170  | 170  | 159.571 | 81.8315   | 124     |
| 123 | 120  | 132  | 112  | 132  | 133  | 124.143 | 73.0252   | 108     |
| 196 | 151  | 152  | 158  | 161  | 165  | 163.571 | 89.8744   | 141     |
| 142 | 148  | 145  | 152  | 147  | 157  | 138     | 77.5281   | 126     |
| 126 | 142  | 146  | 151  | 151  | 155  | 136.857 | 73.1856   | 137     |
| 174 | 180  | 184  | 185  | 188  | 189  | 170.429 | 90.6535   | 169     |
| 137 | 147  | 149  | 147  | 148  | 151  | 138.143 | 74.6718   | 124     |
| 144 | 148  | 156  | 147  | 160  |      | 139.5   | 78.3708   | 107     |
| 148 | 162  | 163  | 165  | 168  | 169  | 152.857 | 77.5925   | 151     |
| 172 | 181  | 189  | 189  | 193  | 194  | 173.571 | 92.8189   | 180     |
| 135 | 141  | 147  | 147  | 142  | 149  | 132.143 | 71.0445   | 136     |
| 118 | 125  | 127  | 123  | 123  | 121  | 117.429 | 74.7953   | 104     |
| 158 | 165  | 167  | 176  | 183  | 182  | 158.429 | 78.8202   | 152     |
| 146 | 154  | 153  | 167  | 161  | 167  | 148.429 | 67.4675   | 158     |
| 71  | 148  | 158  | 172  | 170  | 172  | 141.286 |           | 122     |
| 126 | 132  | 138  | 139  | 141  | 144  | 132.714 | 74.9798   | 91      |
| 124 | 128  | 128  | 132  |      |      | 126.6   | 84.9664   | 118     |
| 135 | 135  | 141  | 137  | 142  | 143  | 131.571 |           | 110     |
| 126 | 132  | 138  | 139  | 144  | 141  | 131     |           | 126     |

Supplementary Table 1.

| HRPost3 | HRPost7 | HRAVGPos1 | %HRPost1 | %HRPost3 | %HRPost7 | %HRAvg  | BP     | HR  |
|---------|---------|-----------|----------|----------|----------|---------|--------|-----|
|         |         | 142.865   | 135.238  | 0        | 0        | 143.946 | 109/69 | 89  |
| 103     | 96      |           | 127.957  | 82.4     | 103.226  | 140.86  | 103/57 | 83  |
| 114     |         |           | 190.411  | 79.7203  | 0        | 203.914 | 139/90 | 82  |
| 78      | 70      |           | 116.456  | 65       | 88.6076  | 145.57  | 131/61 | 70  |
| 126     | 103     |           | 143.396  | 82.3529  | 97.1698  | 146.226 | 112/69 | 80  |
| 94      | 77      | 111.811   | 176.563  | 75.2     | 120.313  | 188.839 | 106/55 | 64  |
| 70      | 70      |           | 83.9623  | 72.1649  | 66.0377  | 92.9919 | 145/64 | 72  |
| 110     | 96      | 119.367   | 138.298  | 82.0896  | 102.128  | 136.93  | 134/75 | 71  |
| 101     | 99      | 117.181   | 129.67   | 74.2647  | 108.791  | 137.834 | 128/61 | 66  |
| 103     | 107     | 112.333   | 81.9355  | 67.3203  | 69.0323  | 101.659 | 120/64 | 94  |
| 105     | 101     | 103.333   | 102.97   | 83.3333  | 100      | 119.378 | 134/83 | 99  |
| 98      | 93      | 100       | 122.472  | 74.8092  | 104.494  | 145.907 | 111/61 | 63  |
| 98      | 99      |           | 100      | 76.5625  | 100      | 119.481 |        |     |
| 97      | 99      |           | 88.5714  | 75.7813  | 94.2857  | 120.136 | 113/63 | 77  |
| 148     | 124     |           | 150.459  | 91.358   | 113.761  | 145.478 | 116/71 | 91  |
| 123     | 113     |           | 143.564  | 73.6527  | 111.881  | 149.646 | 105/91 | 101 |
|         |         | 148.24    | 89.2086  | 0        | 0        | 114.8   | 111/62 | 79  |
|         |         | 117.417   | 92.3077  | 0        | 0        | 106.105 | 137/62 | 85  |
|         |         |           | 87.037   | 0        | 0        | 100.97  | 137/62 | 62  |
| 88      | 93      |           | 168      | 117.333  | 124      | 184     | 147/84 | 70  |
| 114     |         |           | 157.471  | 131.034  | 0        | 157.307 |        | 72  |
| 129     |         |           | 181.72   | 138.71   | 0        | 183.257 | 102/64 | 83  |
| 120     | 85      |           | 140.909  | 136.364  | 96.5909  | 156.981 | 125/58 | 67  |
| 82      | 79      |           | 130.488  | 100      | 96.3415  | 170.122 |        |     |
| 118     | 110     | 139.954   | 158.947  | 124.211  | 115.789  | 160.902 | 118/61 | 54  |
| 155     | 131     |           | 185.567  | 159.794  | 135.052  | 178.94  | 103/74 | 102 |
| 111     | 89      | 122.016   | 212.5    | 173.438  | 139.063  | 206.473 |        | 74  |
| 94      | 90      | 108.519   | 122.353  | 110.588  | 105.882  | 138.151 | 128/71 | 91  |
| 126     | 121     | 145.437   | 194.872  | 161.538  | 155.128  | 203.114 | 136/66 | 65  |
| 123     | 103     | 136.575   | 173.626  | 135.165  | 113.187  | 163.108 | 122/56 | 62  |
| 121     | 95      | 133.481   | 124.49   | 123.469  | 96.9388  | 144.169 | 109/51 | 66  |
| 73      | 68      | 77.3333   | 83.4862  | 66.9725  | 62.3853  | 121.756 | 118/44 | 61  |
| 106     | 102     | 108.667   | 97.5207  | 87.6033  | 84.2975  | 104.628 | 98/61  | 96  |
| 103     | 93      |           | 125      | 117.045  | 105.682  | 149.513 | 132/85 | 83  |
| 105     | 98      | 109.667   | 129.897  | 108.247  | 101.031  | 135.052 | 115/72 | 86  |
